# Supplementary material
Source: publisher figshare collection journal article supplement (https://tandf.figshare.com/ndownloader/files/18733382)
Supplement: Supplementary file 1 [file 18733382]

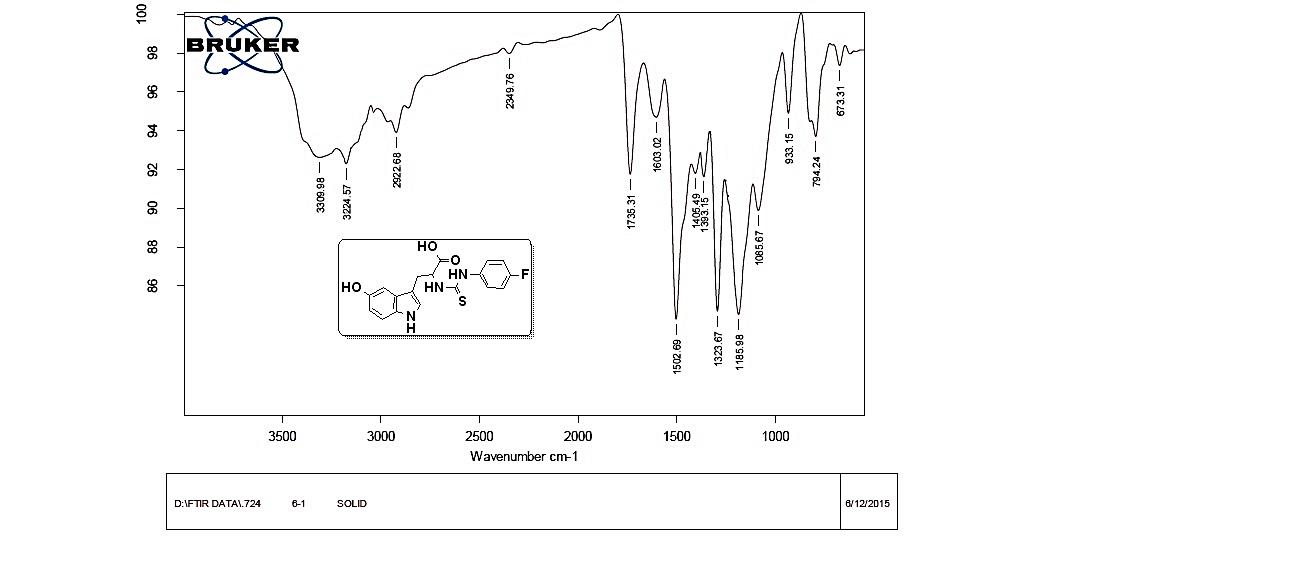


IR spectrum of compound **3a**


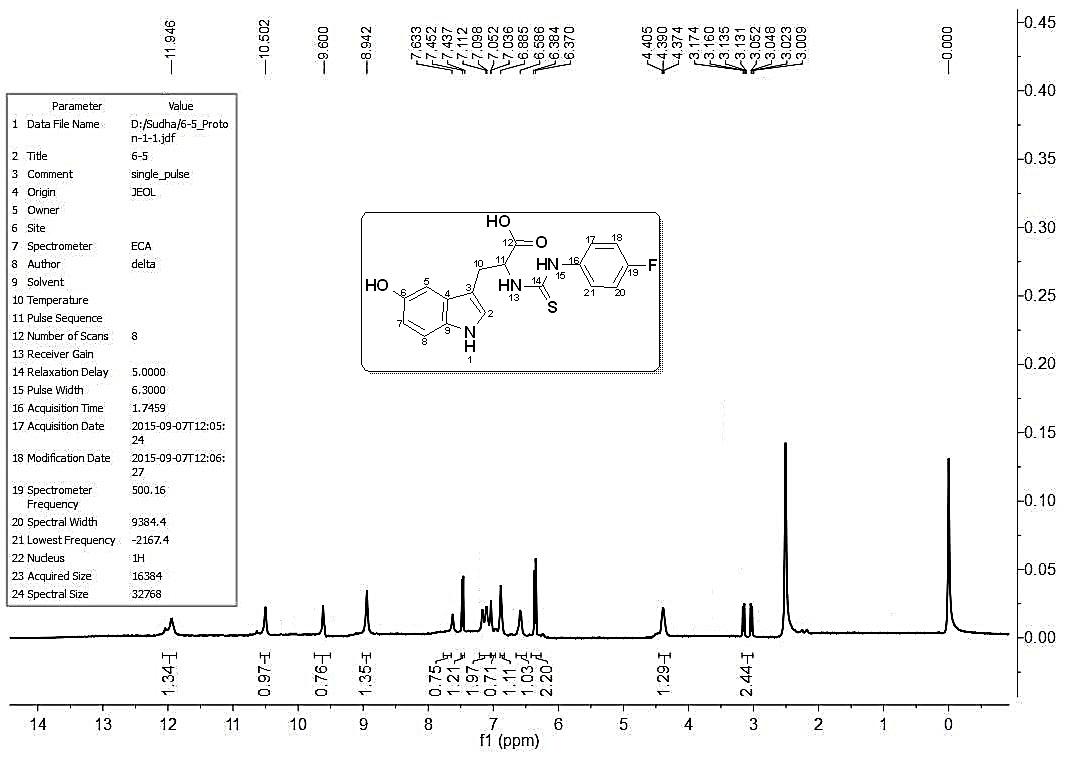


1H NMR Spectrum of compound **3a**


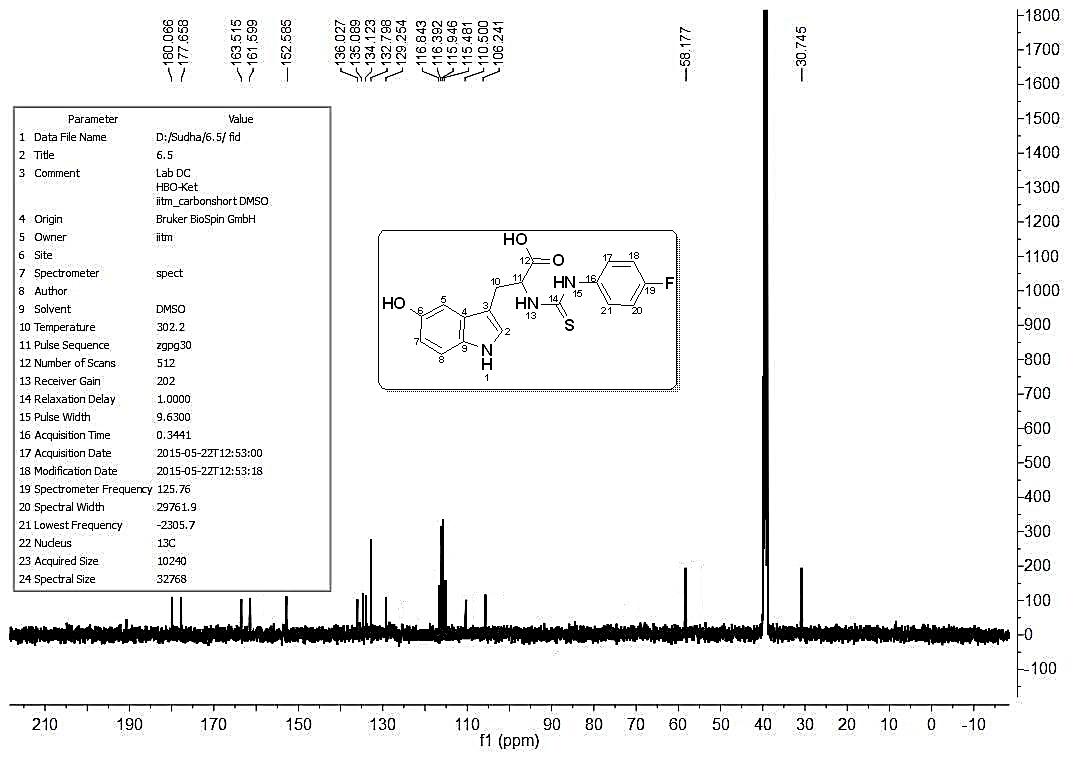


13C NMR Spectrum of compound **3a**


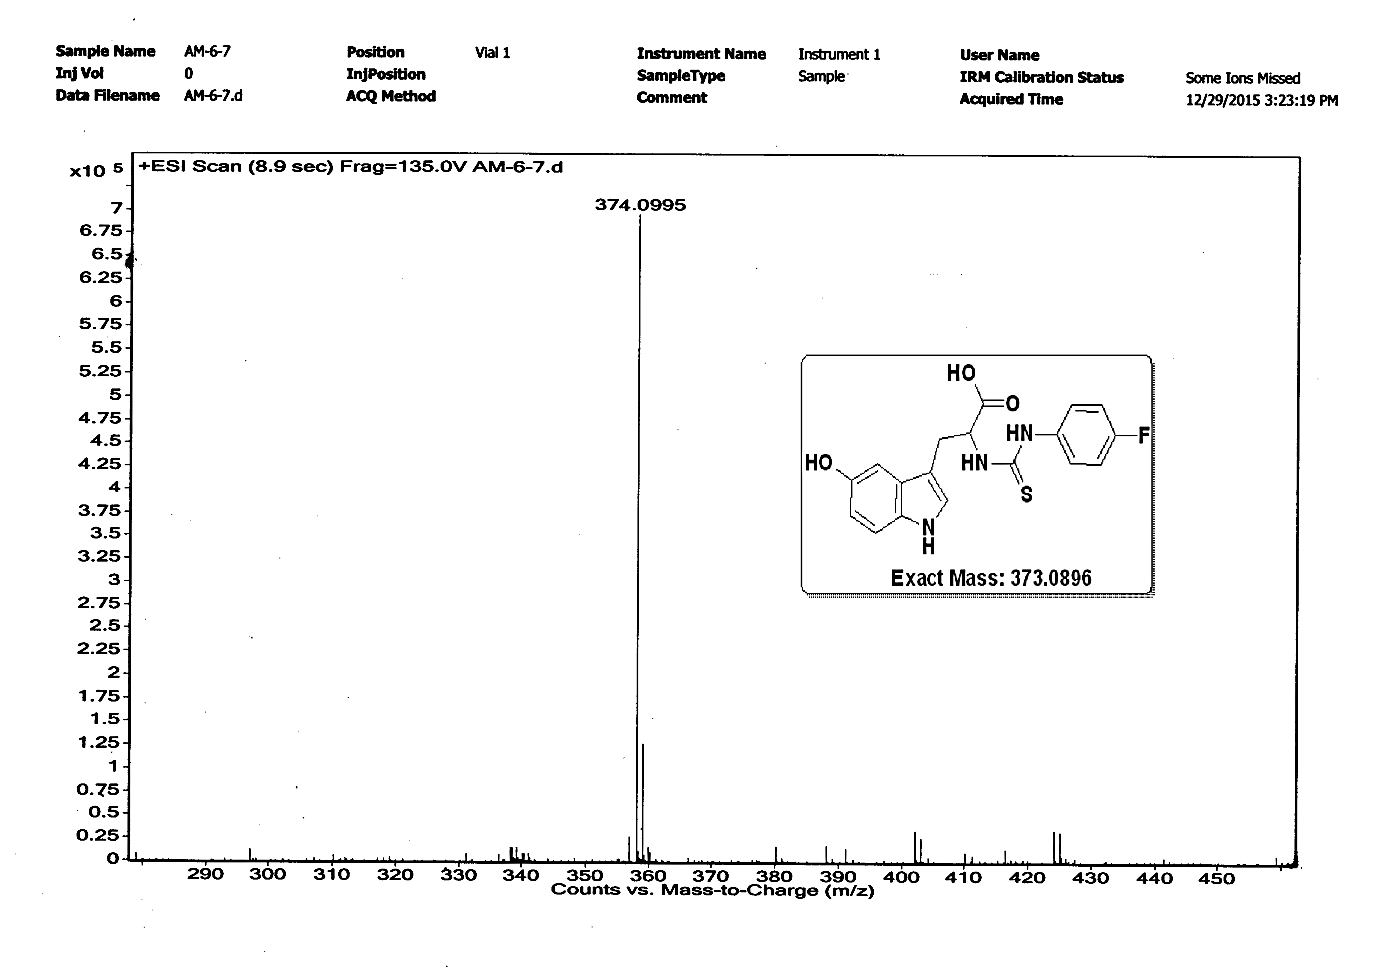


HRMS spectrum of compound **3a**
